# Supplementary material for: Metal retention in human transferrin: Consequences of solvent composition in analytical sample preparation methods
Source: Royal Society of Chemistry journal article supplement (doi:10.1039/c1mt00094b), 2011-01-01
Supplement: c1mt00094b.pdf [file c1mt00094b.pdf]

## Metal Retention in Human Transferrin: Consequences of Solvent Composition in Analytical Sample Preparation Methods

C. Derrick Quarles Jr., K. Manoj Randunu, Julia L. Brumaghim, R. Kenneth Marcus\*

Department of Chemistry, Biosystems Research Complex, Clemson University  
Clemson, South Carolina 29634-0973, USA

### SUPPLEMENTARY INFORMATION

**UV-VIS Spectra:** UV-VIS spectroscopy was used to monitor the loss of iron from Tf under extreme pH conditions and due to urea addition (Figs. S1 and S2).

**Circular Dichroism Spectra:** CD spectroscopy was used to monitor the denaturing effects of guanidinium on the Fe-Tf complex (Fig. S3).

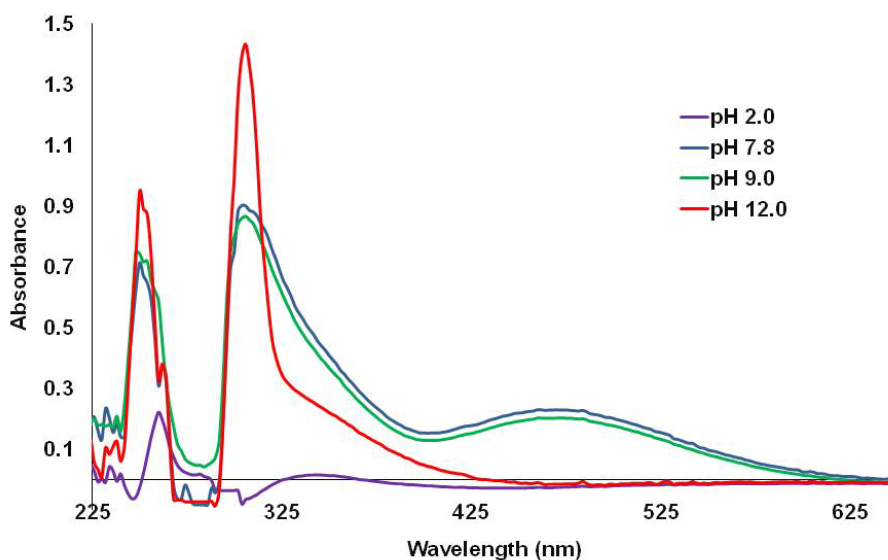

**Fig. S1.** UV-VIS spectra showing the effect of pH on Fe<sup>3+</sup> retention in holo-Tf. Apo-Tf absorbances were subtracted from the Fe<sup>3+</sup>-Tf absorbance spectra to better show absorbances resulting from iron binding.

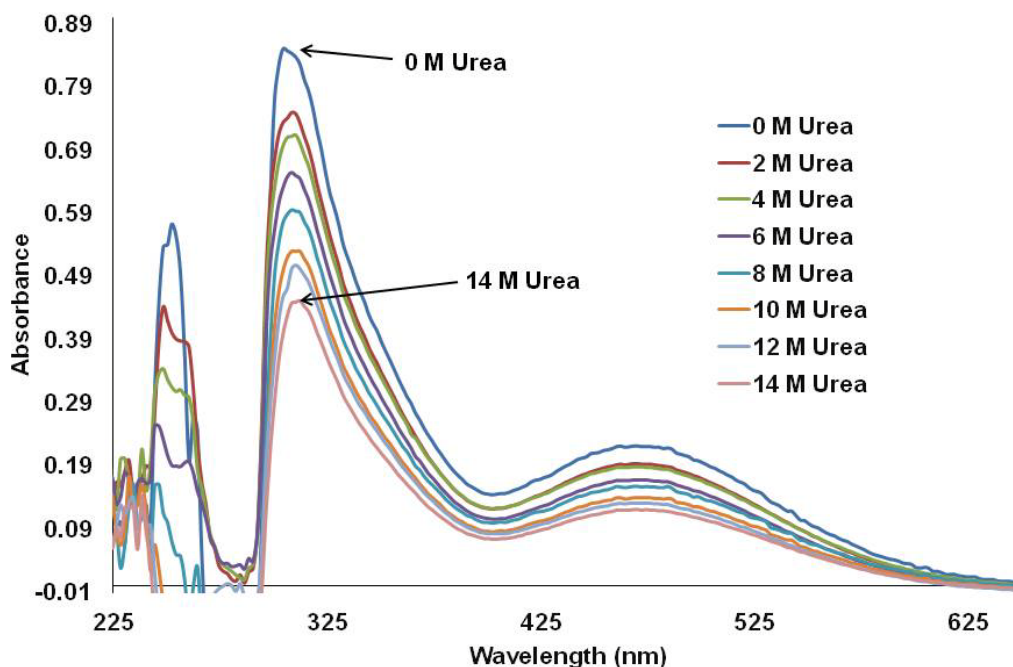

**Fig. S2.** UV-VIS absorbance spectra showing the effects of urea addition (0 – 14 M) on holo-Tf (50  $\mu$ M). Apo-Tf absorbances were subtracted from the Fe<sup>3+</sup>-Tf absorbance spectra to better show absorbances resulting from iron binding.

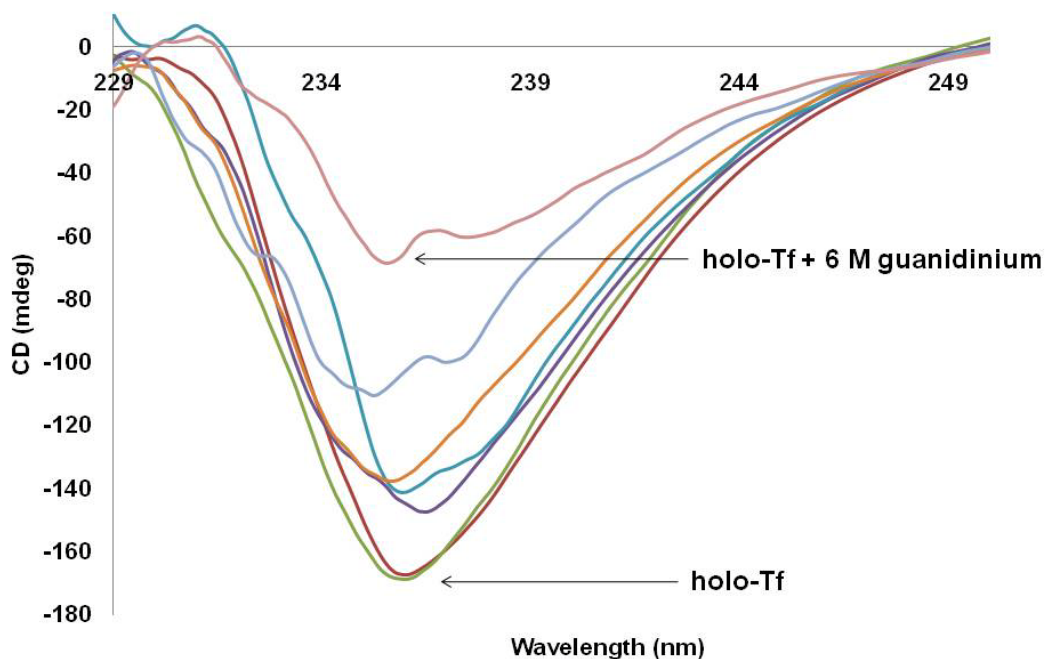

**Fig. S3.** CD spectra displaying the change in optical activity of holo-Tf (50  $\mu$ M) upon addition of guanidinium (0 – 6 M).
